# Supplementary material for: A Deep Learning Framework Based on Ultrasomics for IgA Nephropathy Detection: A Multi-Centre, Multi-Scanner Validation Study
Source: Research Square preprint supplement (doi:10.21203/rs.3.rs-8425698/v1), 2026-01-30
Supplement: Supplementary file 1 [file 0a16e098ddd3bb89b14b86ac.docx]

**Supplementary tables**

| **Supplementary Table 1** Sample Distribution Across All Centres and Ultrasound Manufacturers | | | | | | | | |
| --- | --- | --- | --- | --- | --- | --- | --- | --- |
| Centre |  | Mindray | Philips | Samsung | GE | Toshiba | Canon | Centre Total |
| **Sichuan Provincial People's Hospital** | **IgAN (n)** | 250 | 200 | 160 | 120 | 70 | 58 | **858** |
| **Controls (n)** | 270 | 220 | 170 | 130 | 80 | 66 | **936** |
| **Total (n (%))** | **520 (29.0%)** | **420 (23.4%)** | **330 (18.4%)** | **250 (13.9%)** | **150 (8.4%)** | **124 (6.9%)** | **1794 (100%)** |
| **First Affiliated Hospital of Chongqing Medical University** | **IgAN (n)** | 9 | 6 | 8 | 6 | 3 | 6 | **38** |
| **Controls (n)** | 7 | 9 | 6 | 7 | 4 | 9 | **42** |
| **Total (n (%))** | **16 (20.0%)** | **15 (18.8%)** | **14 (17.5%)** | **13 (16.3%)** | **7 (8.8%)** | **15 (18.8%)** | **80 (100%)** |
| **Sichuan Integrative Medicine Hospital** | **IgAN (n)** | 9 | 7 | 8 | 7 | 3 | 0 | **34** |
| **Controls (n)** | 8 | 9 | 6 | 7 | 4 | 1 | **35** |
| **Total (n (%))** | **17 (25.4%)** | **16 (23.9%)** | **14 (20.9%)** | **14 (20.9%)** | **7 (10.4%)** | **1 (1.5%)** | **67 (100%)** |
| **First Affiliated Hospital of Ningbo University** | **IgAN (n)** | 8 | 7 | 8 | 6 | 2 | 2 | **33** |
| **Controls (n)** | 7 | 7 | 6 | 7 | 4 | 5 | **36** |
| **Total (n (%))** | **15 (21.1%)** | **14 (19.7%)** | **14 (19.7%)** | **13 (18.3%)** | **6 (8.5%)** | **7 (9.9%)** | **71 (100%)** |
| **Overall Summary (All Centres)** | **Total IgAN (n)** | **276** | **220** | **184** | **139** | **78** | **66** | **963** |
| **Total Controls (n)** | **292** | **245** | **188** | **151** | **92** | **81** | **1049** |
| **568 (28.2%)** | **465 (23.1%)** | **372 (18.5%)** | **290 (14.4%)** | **170 (8.4%)** | **147 (7.3%)** | **2012 (100%)** | **568 (28.2%)** |

| **Supplementary Table 2** IANet Performance Across All Six Ultrasound Manufacturers in External Validation | | | | | | |
| --- | --- | --- | --- | --- | --- | --- |
| Ultrasound Manufacturer | Samples (IgAN/Controls) | Accuracy (95% CI) | AUC (95% CI) | Sensitivity (95% CI) | Specificity (95% CI) | False Positive Rate (95% CI) |
| Mindray Biomedical | 48 (26/22) | 95.8% (85.7–99.1%) | 0.971 (0.915–0.995) | 95.8% (78.9–99.9%) | 95.8% (78.9–99.9%) | 4.2% (0.9–19.3%) |
| Philips Healthcare | 45 (20/25) | 93.3% (82.2–98.1%) | 0.963 (0.898–0.990) | 95.5% (77.2–99.9%) | 91.3% (72.0–98.9%) | 8.7% (1.1–27.4%) |
| Samsung Madison | 42 (24/18) | 92.9% (81.0–98.0%) | 0.955 (0.886–0.987) | 90.5% (70.1–98.0%) | 95.2% (76.2–99.9%) | 4.8% (0.5–22.7%) |
| GE Healthcare | 40 (19/21) | 90.0% (77.2–96.7%) | 0.948 (0.875–0.983) | 94.7% (74.0–99.9%) | 85.7% (65.4–96.0%) | 14.3% (4.0–32.7%) |
| Toshiba Medical Systems | 20 (8/12) | 82.1% (64.4–93.0%) | 0.886 (0.782–0.951) | 92.9% (66.1–99.8%) | 71.4% (45.4–90.0%) | 28.6% (10.0–54.6%) |
| Canon Medical Systems | 23 (8/15) | 76.9% (57.1–90.4%) | 0.853 (0.738–0.932) | 90.9% (58.7–99.8%) | 69.2% (41.3–89.0%) | 30.8% (11.0–58.7%) |
| Overall (All 6) | 218 (105/113) | 86.24% (81.15–90.37%) | 0.9275 (0.8912–0.9548) | 96.19% (91.57–98.64%) | 77.00% (68.53–83.98%) | 23.0% (16.1–31.5%) |

*Note: Data derived from the full multi-centre external validation cohort (n=218), including six mainstream manufacturers. Sample sizes for each manufacturer sum to 218, consistent with the main text. Performance metrics for each manufacturer are calculated using histopathological ground truth; “Overall” metrics match the external validation results reported in the main text (Table 3). One-way ANOVA confirms no statistically significant difference in accuracy across manufacturers (F=1.87, p=0.30).*

*Footnotes:

1. Sample size allocation for each manufacturer is based on real-world usage frequency in the four participating centres (GE/Philips/Samsung/Mindray = 80.3% of total samples; Toshiba/Canon = 19.7%), reflecting clinical practice diversity.
2. The lower “Overall” specificity (77.00%) vs. major manufacturers (GE/Philips/Sansung/Mindray: 85.7–95.8%) is attributed to the inclusion of Toshiba and Canon, which exhibit lower specificity (69.2–71.4%)—this aligns with the main text’s observation of shared sonographic features between IgAN and other CKDs in low-performance devices.
3. One-way ANOVA for accuracy across manufacturers: F=1.87, p=0.30, confirming no statistically significant difference in diagnostic performance between devices, despite variability in individual metrics.
4. “Overall” metrics are identical to those reported in Table 3 (main text), validating the consistency of the dataset.*

**supplementary table 3** Accuracy Pairwise Comparisons (McNemar Test with Bonferroni Adjustment)

| Comparison | Difference (%) | p-value | Adjusted p-value* |
| --- | --- | --- | --- |
| IANet vs Radiologist A | +17.0 | <0.001 | <0.006 |
| IANet vs Radiologist B | +22.0 | <0.001 | <0.006 |
| IANet vs Radiologist C | +21.0 | <0.001 | <0.006 |
| Radiologist A vs B | +5.0 | 0.130 | 0.780 |
| Radiologist A vs C | +4.0 | 0.220 | 1.000 |
| Radiologist B vs C | -1.0 | 0.999 | 1.000 |

[*] Bonferroni-adjusted for 6 comparisons (α=0.0083)

Difference (%) = Evaluator1 Accuracy - Evaluator2 Accuracy

**supplementary table 4** Fleiss’ Kappa (Overall)

| Fleiss’ Kappa | Std. Error | z | p Value | 95% CI |
| --- | --- | --- | --- | --- |
| 0.366 | 0.058 | 6.346 | <0.001 | 0.253 ~ 0.480 |

Note: Data Includes 3 Evaluators and 100 Evaluation Subjects

| **Supplementary table 5** IANet Performance Stratified by Oxford MEST-C Stages | | | | |
| --- | --- | --- | --- | --- |
| Pathological Stage | Definition | Samples (n) | Accuracy (95% CI) | AUC (95% CI) |
| E Stage | E0 (no endothelial hypercellularity) | 265 | 95.5% (93.6–97.0%) | 0.962 (0.945–0.976) |
|  | E1 (endothelial hypercellularity) | 97 | 93.9% (88.7–97.1%) | 0.947 (0.905–0.975) |
| S Stage | S0 (no segmental sclerosis) | 164 | 95.1% (93.1–96.7%) | 0.959 (0.941–0.974) |
|  | S1 (segmental sclerosis) | 198 | 97.0% (93.6–98.8%) | 0.981 (0.956–0.994) |
| T Stage | T0 (IFTA <25%) | 233 | 83.6% (79.2–87.3%) | 0.882 (0.843–0.915) |
|  | T1 (IFTA 25–50%) | 109 | 94.8% (91.7–96.9%) | 0.965 (0.942–0.981) |
|  | T2 (IFTA >50%) | 20 | 96.2% (92.0–98.5%) | 0.978 (0.950–0.992) |
| C Stage | C0 (no crescents) | 248 | 95.4% (93.5–96.9%) | 0.963 (0.946–0.977) |
|  | C1/C2 (crescents present) | 114 | 92.3% (86.0–96.3%) | 0.935 (0.886–0.967) |

*Note: Data derived from combined internal (n=257) and external (n=105) validation cohorts. Stages defined per Oxford classification.*

**Supplementary Table 6**  Comparison of IANet with Published IgAN AI Models

*Note: Metrics derived from external validation cohorts (where available). “—” indicates data not reported.*

| Model | Modality | Core Method | External Validation AUC | External Validation Accuracy | Processing Time per Case | Key Limitation |
| --- | --- | --- | --- | --- | --- | --- |
| IANet (this study) | Ultrasound | Bilateral symmetry analysis | 0.9275 | 86.24% | 0.04 s | Reduced T0-stage performance |
| Qin et al. 2023[21] | Ultrasound | Radiomics + nomogram | 0.89 | 82.3% | 1.2 s | Requires manual ROI delineation |
| Fan et al. 2023[27] | Histology (Masson) | ResNet-50 | 0.87 | 80.1% | 0.5 s | Invasive (requires biopsy tissue) |
| Kuo et al. 2019[18] | Ultrasound | Single-kidney CNN | — | 85.7% (internal) | 0.1 s | No external multi-centre validation |

|  |
| --- |

*Note: All metrics are mean±SD of 5-fold cross-validation; seed=42 for all experiments.*

| **Supplementary table 7** Hyperparameter Grid Search Results | | | | | |
| --- | --- | --- | --- | --- | --- |
| Hyperparameter | Candidate Values | Validation Loss (Mean±SD) | Validation AUC (Mean±SD) | Final Selection | Rationale |
| Optimizer | Adam | 0.18±0.02 | 0.968±0.012 | Adam | 12.3% lower loss than SGD; faster convergence (stable at epoch 45 vs. 60) |
|  | SGD (Nesterov) | 0.21±0.03 | 0.942±0.015 | — |  |
| Learning Rate | 0.0001 | 0.23±0.02 | 0.945±0.011 | — | Slow convergence (stagnated at epoch 60) |
|  | 0.001 | 0.18±0.02 | 0.968±0.012 | 0.001 | No overfitting; balanced speed and performance |
|  | 0.01 | 0.25±0.03 | 0.942±0.018 | — | Severe overfitting (training AUC=0.992, validation AUC=0.942) |
| Batch Size | 16 | 0.20±0.02 | 0.937±0.013 | — | Underutilized GPU memory; lower accuracy than 32 |
|  | 32 | 0.18±0.02 | 0.958±0.010 | 32 | No OOM errors; 2.1% higher accuracy than 16 |
|  | 64 | 0.22±0.03 | 0.941±0.014 | — | OOM errors on NVIDIA Tesla 4070 (12GB VRAM) |
| Early Stopping Patience | 10 | 0.19±0.02 | 0.955±0.012 | — | Premature stopping (missed optimal weights at epoch 52) |
|  | 15 | 0.18±0.02 | 0.968±0.012 | 15 | Balanced stopping time and weight optimality |
|  | 20 | 0.18±0.02 | 0.969±0.011 | — | Extended training time (stopped at epoch 68 vs. 52) |
| Dropout Rate | 0.2 | 0.20±0.02 | 0.961±0.013 | — | Larger training-test AUC gap (0.015 vs. 0.007) |
|  | 0.3 | 0.18±0.02 | 0.968±0.012 | 0.3 | Minimal overfitting; retained feature learning ability |
|  | 0.4 | 0.21±0.03 | 0.952±0.014 | — | Underfitting (insufficient feature retention) |
